# Supplementary material
Source: PubMed Central journal article supplement (PMC4215194)
Supplement: NIHMS633623-supplement-e-References.pdf [file NIHMS633623-supplement-e-References.pdf]

## Supplementary references

- [e1] Sheerin UM, Charlesworth G, Bras J, Guerreiro R, Bhatia K, Foltynie T, et al. Screening for VPS35 mutations in Parkinson's disease. *Neurobiol Aging* 2012;33:838 e1–5.
- [e2] Guella I, Solda G, Cilia R, Pezzoli G, Asselta R, Duga S, et al. The Asp620asn mutation in VPS35 is not a common cause of familial Parkinson's disease. *Mov Disord* 2012;27:800–1.
- [e3] Verstraeten A, Wauters E, Crosiers D, Meeus B, Corsmit E, Elinck E, et al. Contribution of VPS35 genetic variability to LBD in the Flanders-Belgian population. *Neurobiol Aging* 2012;33:1844 e11–3.
- [e4] Zhang Y, Chen S, Xiao Q, Cao L, Liu J, Rong TY, et al. Vacuolar protein sorting 35 Asp620Asn mutation is rare in the ethnic Chinese population with Parkinson's disease. *Parkinsonism Relat Disord* 2012;18:638–40.
- [e5] Lesage S, Condroyer C, Klebe S, Honore A, Tison F, Brefel-Courbon C, et al. Identification of VPS35 mutations replicated in French families with Parkinson disease. *Neurology* 2012;78:1449–50.
- [e6] Guo JF, Sun QY, Lv ZY, Yu RL, Li K, Zhang YH, et al. VPS35 gene variants are not associated with Parkinson's disease in the mainland Chinese population. *Parkinsonism Relat Disord* 2012;18:983–5.
- [e7] Deng H, Xu H, Deng X, Song Z, Zheng W, Gao K, et al. VPS35 mutation in Chinese Han patients with late-onset Parkinson's disease. *Eur J Neurol* 2012;19:e96–7.
- [e8] Kumar KR, Weissbach A, Heldmann M, Kasten M, Tunc S, Sue CM, et al. Frequency of the D620N mutation in VPS35 in Parkinson disease. *Arch Neurol* 2012;69:1360–4.
- [e9] Ando M, Funayama M, Li Y, Kashihara K, Murakami Y, Ishizu N, et al. VPS35 mutation in Japanese patients with typical Parkinson's disease. *Mov Disord* 2012;27:1413–7.
- [e10] Sharma M, Ioannidis JP, Aasly JO, Annesi G, Brice A, Bertram L, et al. A multi-centre clinico-genetic analysis of the VPS35 gene in Parkinson disease indicates reduced penetrance for disease-associated variants. *J Med Genet* 2012;49:721–6.
- [e11] Chen Y, Chen K, Song W, Chen X, Cao B, Huang R, et al. VPS35 Asp620Asn and EIF4G1 Arg1205His mutations are rare in Parkinson disease from Southwest China. *Neurobiol Aging* 2013;34:1709 e7–8.
- [e12] Sudhaman S, Behari M, Govindappa ST, Muthane UB, Juyal RC, Thelma BK. VPS35 and EIF4G1 mutations are rare in Parkinson's disease among Indians. *Neurobiol Aging* 2013;34:2442 e1–3.
- [e13] Nuytemans K, Bademci G, Inchausti V, Dressen A, Kinnamon DD, Mehta A, et al. Whole exome sequencing of rare variants in EIF4G1 and VPS35 in Parkinson disease. *Neurology* 2013;80:982–9.
